# Supplementary material
Source: PubMed Central journal article supplement (PMC8349245)
Supplement: NIHMS1726040-supplement-Supplemental_Data.pdf [file NIHMS1726040-supplement-Supplemental_Data.pdf]

## SUPPLEMENTAL MATERIAL

### SUPPLEMENTAL METHODS

#### Voltage protocols in patch-clamp experiments

K<sup>+</sup> currents were measured in the whole-cell patch-clamp at 37±0.1°C.

Voltage-gated K<sup>+</sup> currents (I<sub>to</sub>, I<sub>K,slow</sub> and I<sub>SS</sub>) were activated using 4.5 s long depolarizing pulses ranging from -40 mV to +60 mV arising from a holding potential of -80 mV and repeated in every 10 s. I<sub>to</sub> and I<sub>K,slow</sub> were separated using biexponential fitting (R<sup>2</sup>>0.9 in each case) and low-dose 4-aminopyridine treatment (50 µM), which selectively inhibits I<sub>K,slow</sub> [2, 14]. I<sub>K,slow</sub> was present only in mouse but not in rat and rabbit ventricular myocytes. I<sub>SS</sub> was separated from I<sub>to</sub> and I<sub>K,slow</sub> using high-dose (3 mM) 4-aminopyridine treatment. I<sub>SS</sub> magnitude was measured at the end of the 4.5 s long depolarizing pulse. I<sub>to</sub> inactivation was assessed following low-dose (50 µM) 4-aminopyridine treatment. Time course of I<sub>to</sub> recovery from inactivation was studied using a twin-pulse protocol. Two 500 ms long depolarizations to +40 mV were separated by interpulse intervals (with a holding potential of -80 mV) having variable durations. Peak I<sub>to</sub> amplitude (peak-pedestal at the end of the 500-ms pulse) measured by the second pulse was normalized to that measured by the first pulse, and their ratio (I<sub>2</sub>/I<sub>1</sub>) was plotted against the interpulse interval.

I<sub>K1</sub> was measured as Ba<sup>2+</sup>-sensitive steady-state current at the end of the 500-ms long test pulses between -140 mV and -40 mV in 10 mV steps.

I<sub>Kr</sub> was activated by 3 s long depolarizing pulses to +40 mV arising from the holding potential of -80 mV. I<sub>Kr</sub> was assessed as the E-4031-sensitive tail current amplitudes recorded following repolarization to -40 mV.

#### Drug treatments

The effect of acute treatment with high glucose (30 mM) was assessed following 6 min perfusion in the same cell in self-controlled experiments. Details on drug treatments, doses and supporting references are provided below.

K<sup>+</sup> currents were separated using 4-aminopyridine to selectively inhibit I<sub>K,slow</sub> in low-dose (50 µM) and both I<sub>to</sub> and I<sub>K,slow</sub> in high-dose (3 mM) [2, 14], E-4031 (1 µM) to selectively inhibit I<sub>Kr</sub> [8, 13], and BaCl<sub>2</sub> (300 µM) to inhibit I<sub>K1</sub> [1, 9].

To examine specific signaling pathways, cell pretreatments with selective inhibitors started 15-30 min before the experiments and the drugs were also added to both the perfusion and the pipette solutions.

To assess the contribution of *O*-GlcNAcylation in K<sup>+</sup> channel regulation during hyperglycemia, the following inhibitors were used: 6-diazo-5-oxo-L-norleucine (DON, 50 µM) to inhibit a broad spectrum of amidotransferases, including the glutamine-fructose-6-phosphate amidotransferase which is the first and rate-limiting enzyme in the hexosamine biosynthetic pathway [5], OSMI-1 (50 µM) to selectively inhibit *O*-GlcNAc transferase [7], and Thiamet-G (Thm-G, 100 nM) to selectively inhibit *O*-GlcNAcase [15].

To assess the contribution of protein kinases in K<sup>+</sup> channel regulation during hyperglycemia, the following inhibitors were used: autocalmitide-2-related inhibitory peptide (AIP, 1 µM) to selectively inhibit CaMKII [4], protein kinase inhibitor peptide (PKI, 1 µM) to selectively inhibit PKA [12], and bisindolylmaleimide II (BIM-II, 100 nM) and Go 6976 (100 nM) to selectively inhibit PKC [6, 10]. In the extracellular solution, the cell-permeable myristoylated forms of PKI and AIP were used. As a negative control for PKC inhibitors, bisindolylmaleimide V (BIM-V, 100 nM) was used.

To assess the contribution of ROS in K<sup>+</sup> channel regulation during hyperglycemia, a combination of ROS scavengers was used: reduced glutathione (GSH, 10 mM) [11] and N-acetylcysteine (NAC, 10 mM) [3].

Chemicals were purchased from Sigma-Aldrich (St. Louis, MO, USA), if not specified otherwise. Tetrodotoxin and Go 6976 were from Calbiochem (Burlington, MA, USA), E-4031 was from Tocris (Bristol, UK), and BIM-V was from Santa Cruz Biotechnology (Dallas, TX, USA).

| Gene   | Protein         | I <sub>K</sub>       | Forward primer (5' to 3') | Reverse primer (5' to 3') |
|--------|-----------------|----------------------|---------------------------|---------------------------|
| Gapdh  | GAPDH           | N/A                  | AACAGCAACTCCCCTCTTC       | CCTGTTGCTGTAGCCGTATT      |
| S18    | 18S rRNA        | N/A                  | AAAGCAGACATCGACCTCAC      | GTAATCCCATCCTTCACATCC     |
| Camk2d | CaMKII $\delta$ | N/A                  | GTGACACCTGAAGCCAAAGA      | CATCATGGAGGCAACAGTAGAG    |
| Camk2g | CaMKII $\gamma$ | N/A                  | AAGCTGGAGCCTACGATTC       | GCGCTTTGCAGGGTTTAT        |
| Anf    | ANF             | N/A                  | CAGGCCATATTGGAGCAAATC     | GGGCATGACCTCATCTTCTAC     |
| Myh7   | $\beta$ -MHC    | N/A                  | AGATGGCTGGTTTGGATGAG      | TTGGCCTTGGTCAGAGTATTG     |
| Kcnd2  | Kv4.2           | I <sub>to,fast</sub> | CGCCACATCCTCAACTTCTA      | CGGTCCTTGTACTCCTCATAAC    |
| Kcnd3  | Kv4.3           | I <sub>to,fast</sub> | GTGGCCATCATGCCCTATTA      | GAAGATCCTGAAGACACGGAAG    |
| Kenip2 | KChIP2          | I <sub>to,fast</sub> | TGATAGACTGAACTGGGCTTTC    | GTAGGTGTACTTGCCCATCAT     |
| Kcna4  | Kv1.4           | I <sub>to,slow</sub> | ATCGTGGAGACAGTGTGTATTG    | GCCCAGAGTGATGAAGTAAGG     |
| Kcna5  | Kv1.5           | I <sub>K,slow</sub>  | TGAGGATGAGGAGGAGAAG       | CGCAAACCCGAGATGTTTATG     |
| Kcnb1  | Kv2.1           | I <sub>K,slow</sub>  | GGCTTGTATCACGATCCTCTTAG   | GCACTTGCTGTGGTGTAGAT      |
| Kcnk2  | TREK-1          | I <sub>ss</sub>      | CTGTTTGGCTGTGTCTCTT       | CTGCCACGTAGTCTCCAAATC     |
| Kcnk3  | TASK-1          | I <sub>ss</sub>      | GGACTTTCTTCCAGGCCTATT     | GAAGCTGAAGGCCACATACT      |
| Kcnj2  | Kir2.1          | I <sub>K1</sub>      | GGTACCTGGCAGACATCTTTAC    | GAGCAGGGCTATCAACCAA       |
| Kcnj12 | Kir2.2          | I <sub>K1</sub>      | AAGGGCCTAGACCGTATCTT      | CTCAAAGTCGTCTGTCTCAAGG    |
| Kcnh2a | hERG1a          | I <sub>Kr</sub>      | CCCTCCATCAAGGACAAGTATG    | GCATGACACAGATGGAGAAGA     |
| Kcnh2b | hERG1b          | I <sub>Kr</sub>      | GCTTACTGCCCTCTACTTCATC    | CTTTCCAGGACGGGCATATAG     |
| Kcnq1  | Kv7.1           | I <sub>Ks</sub>      | CTGGGCTCTGTAGTCTTCATTC    | CTCGTTCACCGCATCTTTCT      |
| Kcne1  | MinK            | I <sub>Ks</sub>      | CCCAATTCCACGACTGTTCT      | CAGCACCATGAGGATGTAGAG     |

**Supplemental Table 1. The sequence of specific primers used in qRT-PCR.**

Examined genes, encoded proteins and related K<sup>+</sup> currents (if applicable) with the corresponding forward and reverse primers are listed.

|             | WT + Vehicle |                         | WT + STZ  |                         |
|-------------|--------------|-------------------------|-----------|-------------------------|
|             | Pre-inj.     | 4-wk Post-inj.          | Pre-inj.  | 4-wk Post-inj.          |
| N (animals) | 7            |                         | 5         |                         |
| FS (%)      | 21.3±2.3     | 20.4±1.0 <sup>NS</sup>  | 24.6±3.8  | 24.0±0.8 <sup>NS</sup>  |
| LVIDd (mm)  | 3.90±0.23    | 4.05±0.13 <sup>NS</sup> | 3.82±0.15 | 4.06±0.13 <sup>NS</sup> |
| LVIDs (mm)  | 3.11±0.25    | 3.22±0.10 <sup>NS</sup> | 2.90±0.24 | 3.06±0.08 <sup>NS</sup> |
| LVPWd (mm)  | 0.88±0.08    | 0.82±0.03 <sup>NS</sup> | 0.82±0.11 | 0.71±0.03 <sup>NS</sup> |
| LVPWs (mm)  | 1.24±0.11    | 1.14±0.08 <sup>NS</sup> | 1.15±0.12 | 0.95±0.05 <sup>NS</sup> |
| IVSd (mm)   | 0.92±0.06    | 0.92±0.4 <sup>NS</sup>  | 0.88±0.08 | 0.84±0.09 <sup>NS</sup> |
| IVSs (mm)   | 1.18±0.06    | 1.25±0.06 <sup>NS</sup> | 1.25±0.10 | 1.21±0.07 <sup>NS</sup> |

**Supplemental Table 2. Echocardiography parameters in diabetic mice.**

Cardiac contractile function was assessed by M-mode echocardiography before and 4 weeks after low-dose streptozotocin (STZ) injection (for 5 consecutive days) to induce type 1 diabetes mellitus versus vehicle control in wild-type (WT) male mice. Comparisons between pre- and post-injection parameters were made using Student's paired *t* test, *NS* indicates non-significance.

(FS, fractional shortening, calculated as  $FS = (LVIDd - LVIDs) / LVIDd \times 100$ ; LVIDd and LVIDs, left ventricular end-diastolic and end-systolic diameters, respectively; LVPWd and LVPWs, left ventricular posterior wall thicknesses at diastole and at systole, respectively; IVSd and IVSs are intraventricular septal thicknesses at diastole and at systole, respectively.)

|                       | WT + Sham  |                         | WT + TAC   |                                 |
|-----------------------|------------|-------------------------|------------|---------------------------------|
|                       | Pre-op     | 8-wk Post-op            | Pre-op     | 8-wk Post-op                    |
| N (animals)           | 3          |                         | 4          |                                 |
| FS (%)                | 22.4±2.0   | 22.4±0.8 <sup>NS</sup>  | 20.5±2.1   | 11.4±1.2 <sup>P=0.01</sup>      |
| LVIDd (mm)            | 3.86±0.19  | 4.34±0.33 <sup>NS</sup> | 4.02±0.14  | 4.66±0.12 <sup>P=0.02</sup>     |
| LVIDs (mm)            | 2.99±0.16  | 3.37±0.29 <sup>NS</sup> | 3.20±0.17  | 4.13±0.14 <sup>P=0.01</sup>     |
| Heart weight (mg)     | <i>N/A</i> | 0.24±0.01               | <i>N/A</i> | 0.40±0.03 <sup>P=0.01</sup>     |
| Body weight (mg)      | <i>N/A</i> | 31.6±1.5                | <i>N/A</i> | 32.0±2.2 <sup>NS</sup>          |
| HW / BW (%)           | <i>N/A</i> | 0.76±0.07               | <i>N/A</i> | 1.29±0.17 <sup>P=0.05</sup>     |
| Cell capacitance (pF) | <i>N/A</i> | 148.8±1.8               | <i>N/A</i> | 246.2±8.1 <sup>P&lt;0.001</sup> |

**Supplemental Table 3. Echocardiography and morphometric parameters in heart failure mice.**

Cardiac contractile function was assessed by M-mode echocardiography before and 8 weeks after transverse aortic constriction (TAC) surgery to induce heart failure (HF) versus sham control in wild-type (WT) male mice. Enlarged left ventricular dimensions and significantly reduced fraction shortening measured in M-mode echocardiography demonstrate ventricular dilation and functional impairment in HF. Increased heart weight, HW/BW and cell capacitance demonstrate significant myocardial hypertrophy in HF. Student's *t* test, paired (echocardiography) or unpaired (morphometry). *NS* indicates non-significance. *N/A* indicates not applicable.

(FS, fractional shortening, calculated as  $FS = (LVIDd - LVIDs) / LVIDd \times 100$ ; LVIDd and LVIDs, left ventricular end-diastolic and end-systolic diameters, respectively; HW/BW, heart weight to body weight ratio.)

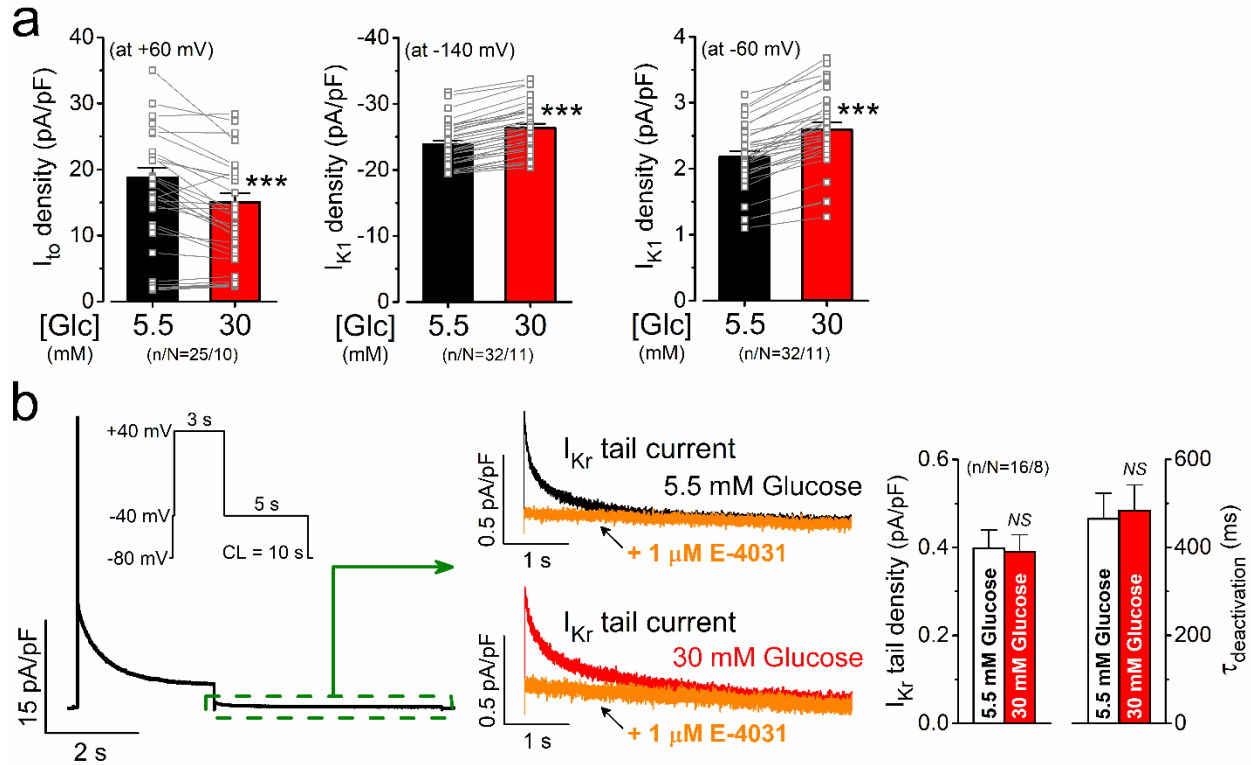

**Supplemental Figure 1. Acute hyperglycemia and  $K^+$  currents in mouse ventricular myocytes.**

**a** Acute hyperglycemia (30 mM glucose, 6 min) significantly reduced the transient outward  $K^+$  current ( $I_{to}$ ) and increased the inward rectifier  $K^+$  current ( $I_{K1}$ ). Paired data are shown in individual cells.

**b** Representative rapid delayed rectifier  $K^+$  current ( $I_{Kr}$ ) traces and averaged data.  $I_{Kr}$  tail current density and deactivation time constant ( $\tau_{deactivation}$ ) were unchanged in acute hyperglycemia.

Student's two-tailed, paired  $t$ -test; *NS*, non-significant; \*\*\* $p < 0.001$ .

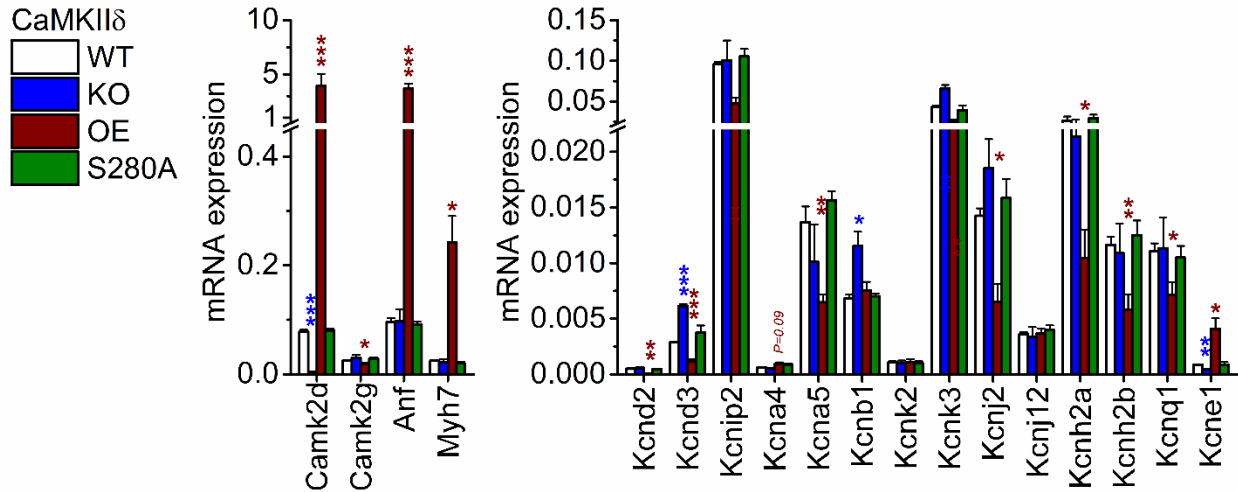

**Supplemental Figure 2. mRNA expression of CaMKII and K<sup>+</sup> channel genes.**

mRNA expression of Camk2d, Camk2g, hypertrophic markers (Anf, Myh7), and K<sup>+</sup> channel genes assessed by qRT-PCR in WT control, CaMKII $\delta$ -knockout (KO), overexpression (OE) and *O*-GlcNAc-resistant S280A knock-in mouse hearts. ANOVA; \* $p$ <0.05, \*\* $p$ <0.01, \*\*\* $p$ <0.001.

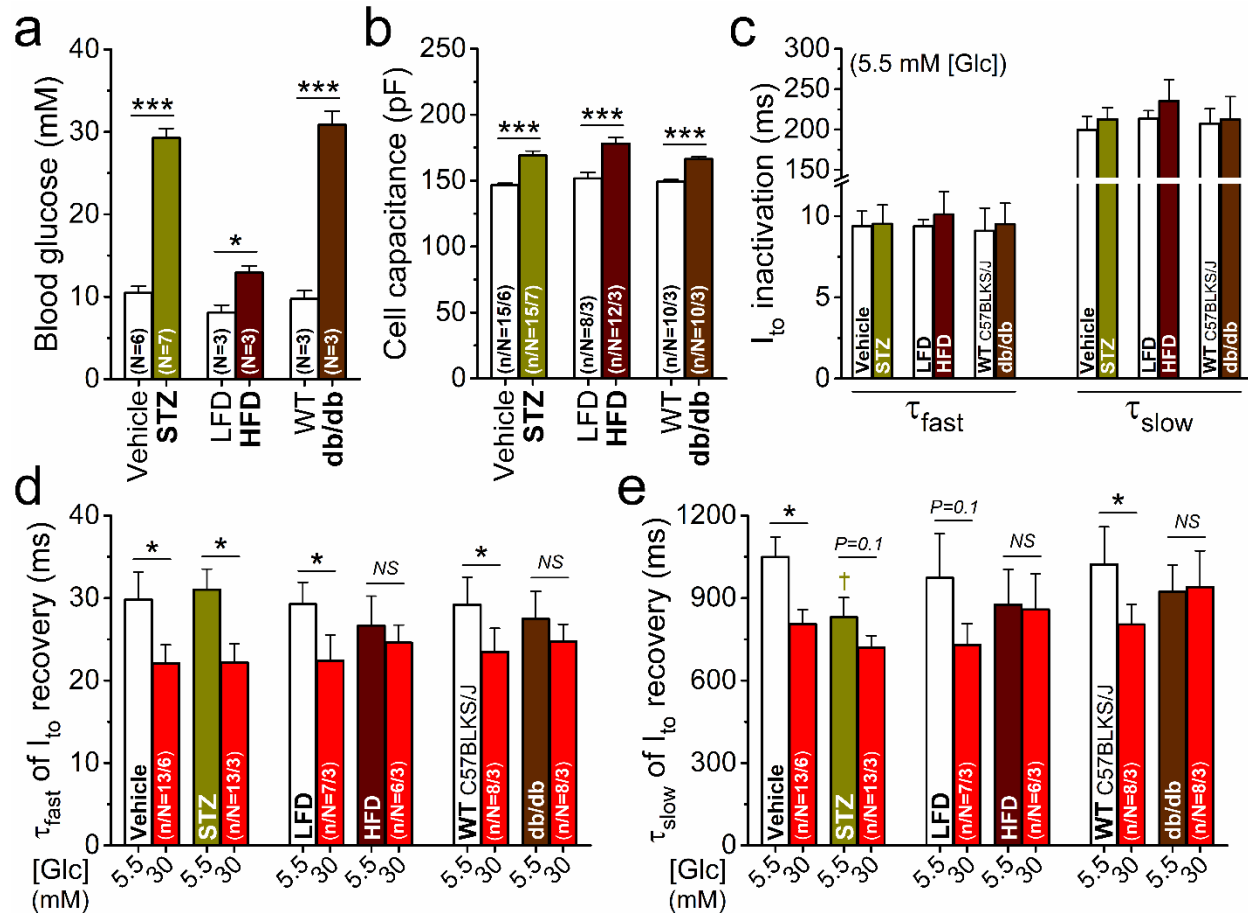

**Supplemental Figure 3. Blood glucose levels, cellular hypertrophy, and  $K^+$  current kinetics in diabetes.**

**a** Elevated blood glucose levels in streptozotocin (STZ)-treated type 1 diabetes mellitus (vs. vehicle control), in high-fat diet (HFD)-induced type 2 diabetes mellitus (vs. low-fat diet, LFD) and in *db/db*, a genetic model for type 2 diabetes mellitus (vs. wild-type C57BLKS/J). **b** Cardiomyocyte hypertrophy in diabetic mouse models. **c** Inactivation kinetics of the transient outward  $K^+$  current ( $I_{to}$ ) were unchanged in all diabetic models. **d, e**  $I_{to}$  recovery from inactivation kinetics. Hyperglycemia decreased the time constants for both the fast (**d**) and the slow (**e**) components of  $I_{to}$  recovery in STZ (and all controls), but not in HFD or *db/db*. ANOVA; \* $p$ <0.05, \*\* $p$ <0.01, \*\*\* $p$ <0.001 vs. normoglycemia; † $p$ <0.05 vs. control.



## SUPPLEMENTAL REFERENCES

1. Alagem N, Dvir M, Reuveny E (2001) Mechanism of Ba(2+) block of a mouse inwardly rectifying K<sup>+</sup> channel: differential contribution by two discrete residues. *J Physiol* 534:381-393 doi:10.1111/j.1469-7793.2001.00381.x
2. Brouillette J, Clark RB, Giles WR, Fiset C (2004) Functional properties of K<sup>+</sup> currents in adult mouse ventricular myocytes. *J Physiol* 559:777-798 doi:10.1113/jphysiol.2004.063446
3. Ezerina D, Takano Y, Hanaoka K, Urano Y, Dick TP (2018) N-Acetyl Cysteine Functions as a Fast-Acting Antioxidant by Triggering Intracellular H<sub>2</sub>S and Sulfane Sulfur Production. *Cell Chem Biol* 25:447-459 e444 doi:10.1016/j.chembiol.2018.01.011
4. Ishida A, Kameshita I, Okuno S, Kitani T, Fujisawa H (1995) A novel highly specific and potent inhibitor of calmodulin-dependent protein kinase II. *Biochem Biophys Res Commun* 212:806-812 doi:10.1006/bbrc.1995.2040
5. Marshall S, Bacote V, Traxinger RR (1991) Discovery of a metabolic pathway mediating glucose-induced desensitization of the glucose transport system. Role of hexosamine biosynthesis in the induction of insulin resistance. *J Biol Chem* 266:4706-4712
6. Martiny-Baron G, Kazanietz MG, Mischak H, Blumberg PM, Kochs G, Hug H, Marme D, Schachtele C (1993) Selective inhibition of protein kinase C isozymes by the indolocarbazole Go 6976. *J Biol Chem* 268:9194-9197
7. Ortiz-Meoz RF, Jiang J, Lazarus MB, Orman M, Janetzko J, Fan C, Duveau DY, Tan ZW, Thomas CJ, Walker S (2015) A small molecule that inhibits OGT activity in cells. *ACS Chem Biol* 10:1392-1397 doi:10.1021/acscembio.5b00004
8. Sanguinetti MC, Jurkiewicz NK (1990) Two components of cardiac delayed rectifier K<sup>+</sup> current. Differential sensitivity to block by class III antiarrhythmic agents. *J Gen Physiol* 96:195-215 doi:10.1085/jgp.96.1.195
9. Schram G, Pourrier M, Wang Z, White M, Nattel S (2003) Barium block of Kir2 and human cardiac inward rectifier currents: evidence for subunit-heteromeric contribution to native currents. *Cardiovasc Res* 59:328-338 doi:10.1016/s0008-6363(03)00366-3
10. Toullec D, Pianetti P, Coste H, Bellevergue P, Grand-Perret T, Ajakane M, Baudet V, Boissin P, Boursier E, Loriolle F, et al. (1991) The bisindolylmaleimide GF 109203X is a potent and selective inhibitor of protein kinase C. *J Biol Chem* 266:15771-15781
11. Townsend DM, Tew KD, Tapiero H (2003) The importance of glutathione in human disease. *Biomed Pharmacother* 57:145-155 doi:10.1016/s0753-3322(03)00043-x
12. Walsh DA, Ashby CD, Gonzalez C, Calkins D, Fischer EH (1971) Krebs EG: Purification and characterization of a protein inhibitor of adenosine 3',5'-monophosphate-dependent protein kinases. *J Biol Chem* 246:1977-1985
13. Wettwer E, Scholtysik G, Schaad A, Himmel H, Ravens U (1991) Effects of the new class III antiarrhythmic drug E-4031 on myocardial contractility and electrophysiological parameters. *J Cardiovasc Pharmacol* 17:480-487 doi:10.1097/00005344-199103000-00018
14. Xu H, Guo W, Nerbonne JM (1999) Four kinetically distinct depolarization-activated K<sup>+</sup> currents in adult mouse ventricular myocytes. *J Gen Physiol* 113:661-678 doi:10.1085/jgp.113.5.661
15. Yuzwa SA, Macauley MS, Heinonen JE, Shan X, Dennis RJ, He Y, Whitworth GE, Stubbs KA, McEachern EJ, Davies GJ, Vocadlo DJ (2008) A potent mechanism-inspired O-GlcNAcase inhibitor that blocks phosphorylation of tau in vivo. *Nat Chem Biol* 4:483-490 doi:10.1038/nchembio.96
